# Supplementary material for: PtxNi10−xO nanoparticles supported on N-doped graphene oxide with a synergetic effect for highly efficient hydrolysis of ammonia borane
Source: Royal Society of Chemistry journal article supplement (doi:10.1039/c7cy01742a), 2017-01-01
Supplement: c7cy01742a1.pdf [file c7cy01742a1.pdf]

## Supplementary Materials

### **Pt<sub>x</sub>Ni<sub>10-x</sub>O Nanoparticles Supported on N-doped Graphene Oxides with A Synergetic Effect for Highly Efficient Hydrolysis of Ammonia Borane**

*Binhua Zhao,<sup>a,1</sup> Kun Feng,<sup>a,1</sup> Yun Wang,<sup>a</sup> Xiaoxin Lv,<sup>a</sup> Hechuang Zheng,<sup>a</sup> Yanyun Ma,<sup>a,\*</sup> Wensheng Yan,<sup>b</sup> Xuhui Sun,<sup>a,\*</sup> and Jun Zhong<sup>a,\*</sup>*

<sup>a</sup> Institute of Functional Nano and Soft Materials Laboratory (FUNSOM), Jiangsu Key Laboratory for Carbon-Based Functional Materials & Devices, Soochow University, Suzhou 215123, China

<sup>b</sup> National Synchrotron Radiation Laboratory, University of Science and Technology of China, Hefei, Anhui 230029, China

<sup>1</sup> The two authors have equal contribution to this work.

\* **Address correspondence to** mayanyun@suda.edu.cn (Y. Ma); xhsun@suda.edu.cn (X. Sun);

jzhong@suda.edu.cn (J. Zhong)

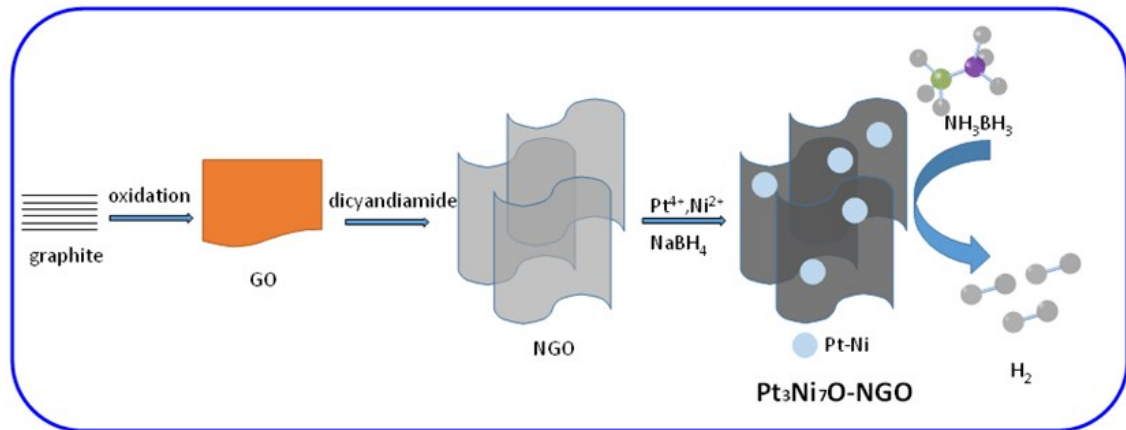

**Fig. S1.** Illustration of the preparation processes for the Pt<sub>3</sub>Ni<sub>7</sub>O-NGO sample.

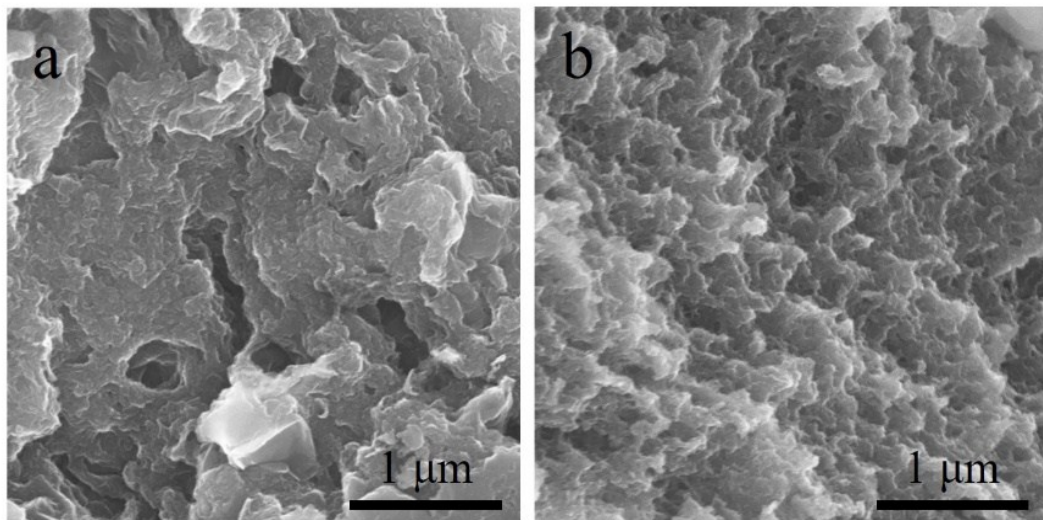

**Fig. S2.** SEM images of (a) pure NGO and (b) Pt<sub>3</sub>Ni<sub>7</sub>O-NGO.

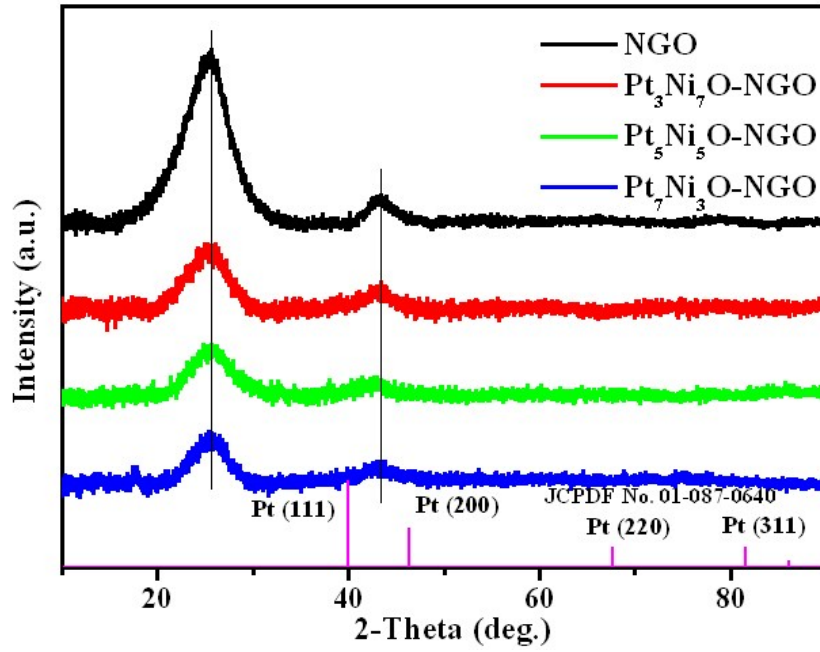

**Fig. S3.** XRD patterns of NGO and  $\text{Pt}_x\text{Ni}_{10-x}\text{O}$ -NGO samples. The two broad diffraction peaks are attributed to NGO substrate. No obvious XRD peak can be observed for the  $\text{Pt}_x\text{Ni}_{10-x}\text{O}$  NPs.

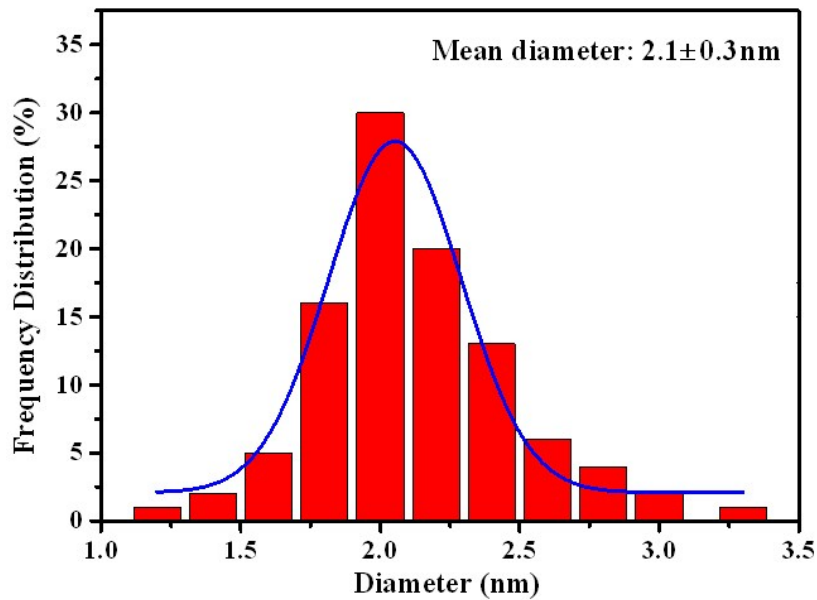

**Fig. S4.** The particle size distribution of  $\text{Pt}_3\text{Ni}_7\text{O}$ -NGO with an average size of 2.1 nm.

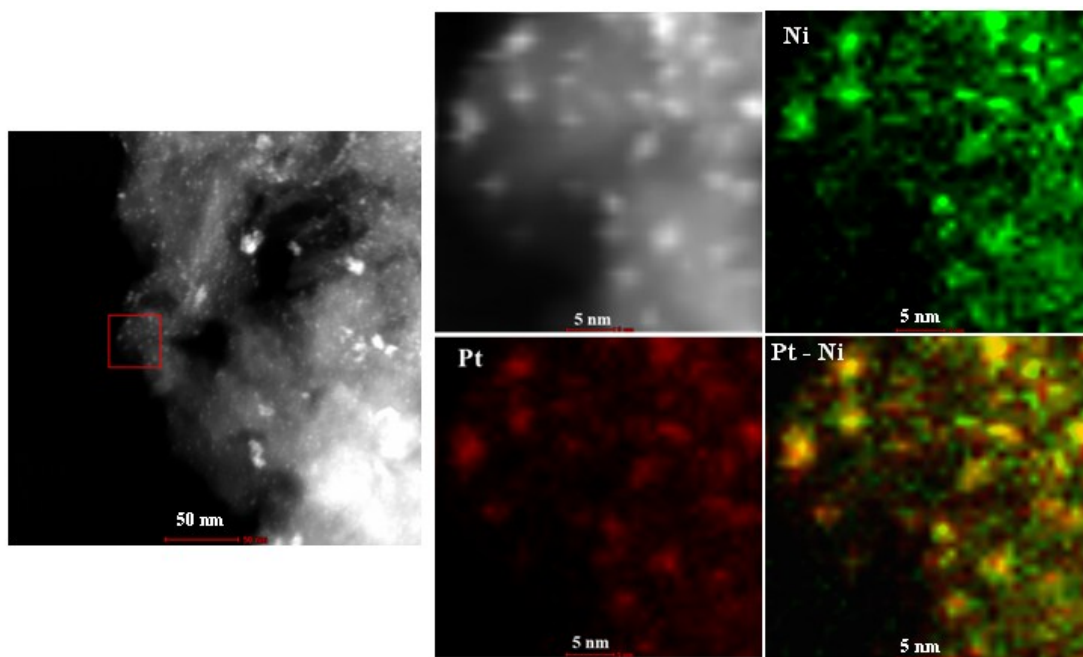

**Fig. S5.** Dark field TEM image and the high-resolution elemental mappings of  $\text{Pt}_3\text{Ni}_7\text{O-NGO}$ .

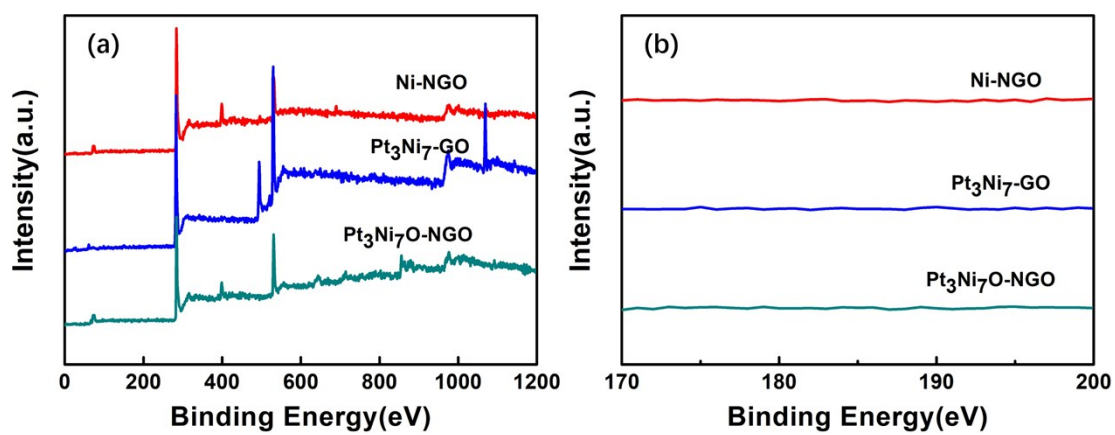

**Fig. S6.** XPS spectra of  $\text{Pt}_3\text{Ni}_7\text{O-NGO}$ ,  $\text{Pt}_3\text{Ni}_7\text{-GO}$  and Ni-NGO: (a) the survey spectra, (b) the high-resolution spectra at B 1s edge.

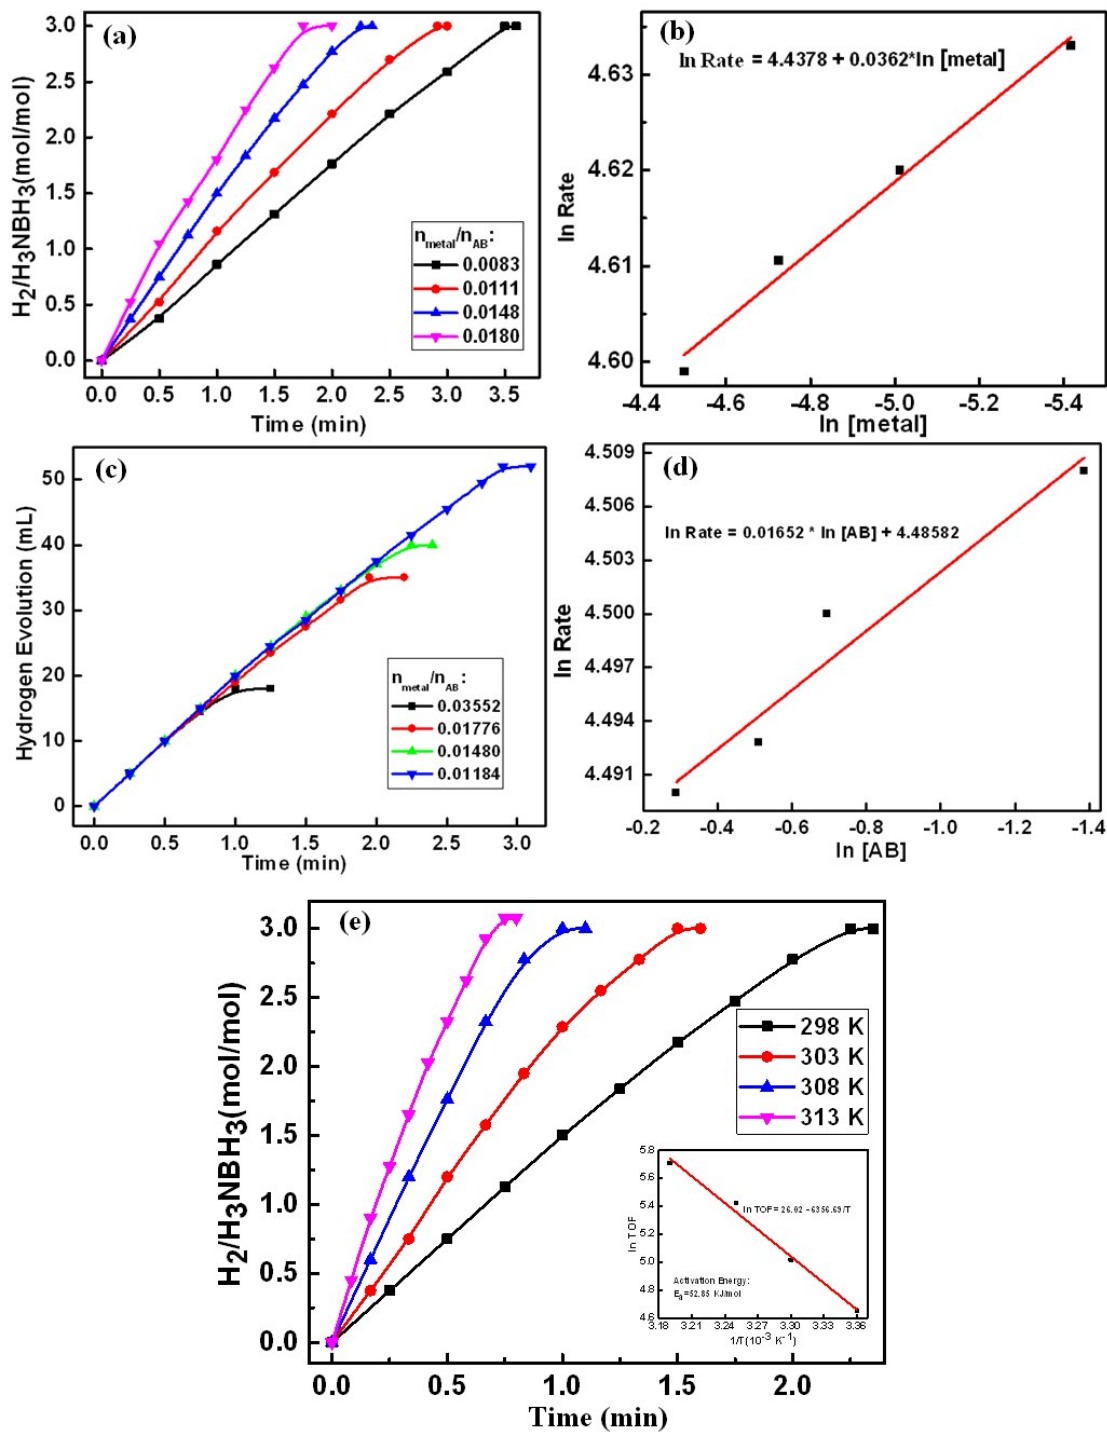

**Fig. S7.** (a) Stoichiometric hydrogen evolution in aqueous solution at a fixed amount of AB with various Pt<sub>3</sub>Ni<sub>7</sub>O-NGO/AB molar ratios at 298 K; (c) Relationship between hydrogen-generating rate and AB concentration at a fixed amount of Pt<sub>3</sub>Ni<sub>7</sub>O-NGO in aqueous solution at 298 K; (b) and (d): Logarithmic plots of rate versus [Pt<sub>3</sub>Ni<sub>7</sub>O-NGO] and [AB], respectively. (e) Hydrogen-generating rate as a function of temperature in the

hydrolysis of AB catalyzed by  $\text{Pt}_3\text{Ni}_7\text{O-NGO}$ . Inset: Arrhenius plot of  $\ln(\text{TOF})$  versus  $1/T$ . The activation energy is calculated to be 52.85 kJ/mol.

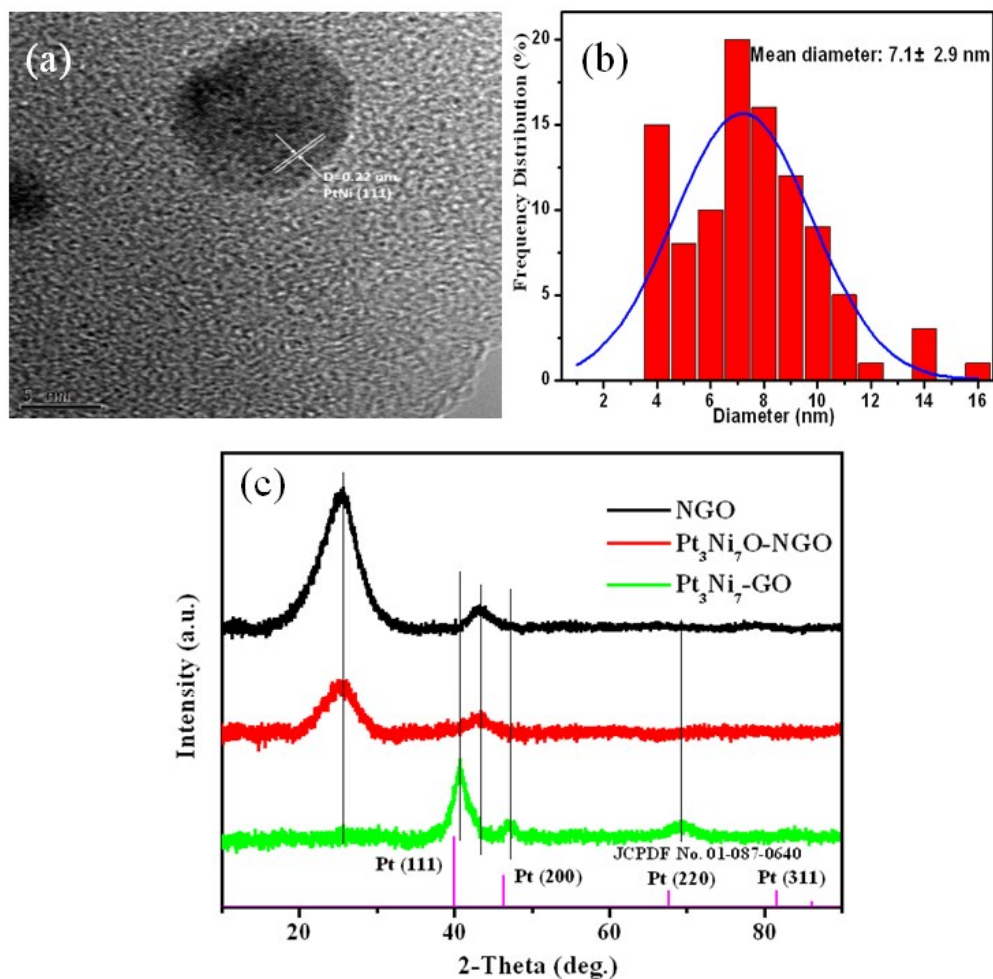

**Fig. S8.** TEM image (a), particle size distribution (b) and XRD pattern of  $\text{Pt}_3\text{Ni}_7\text{-GO}$ . The XRD patterns of NGO,  $\text{Pt}_3\text{Ni}_7\text{O-NGO}$  and the standard Pt are shown for comparison.

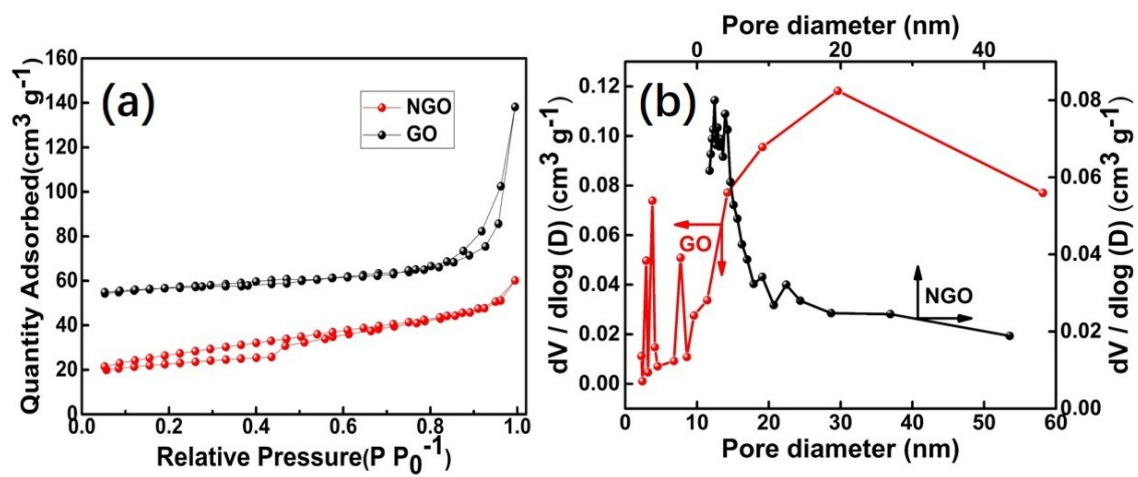

**Fig. S9.** (a) N<sub>2</sub> adsorption-desorption isotherms of NGO and GO at 77 K. (b) The corresponding pore size distributions of NGO and GO.

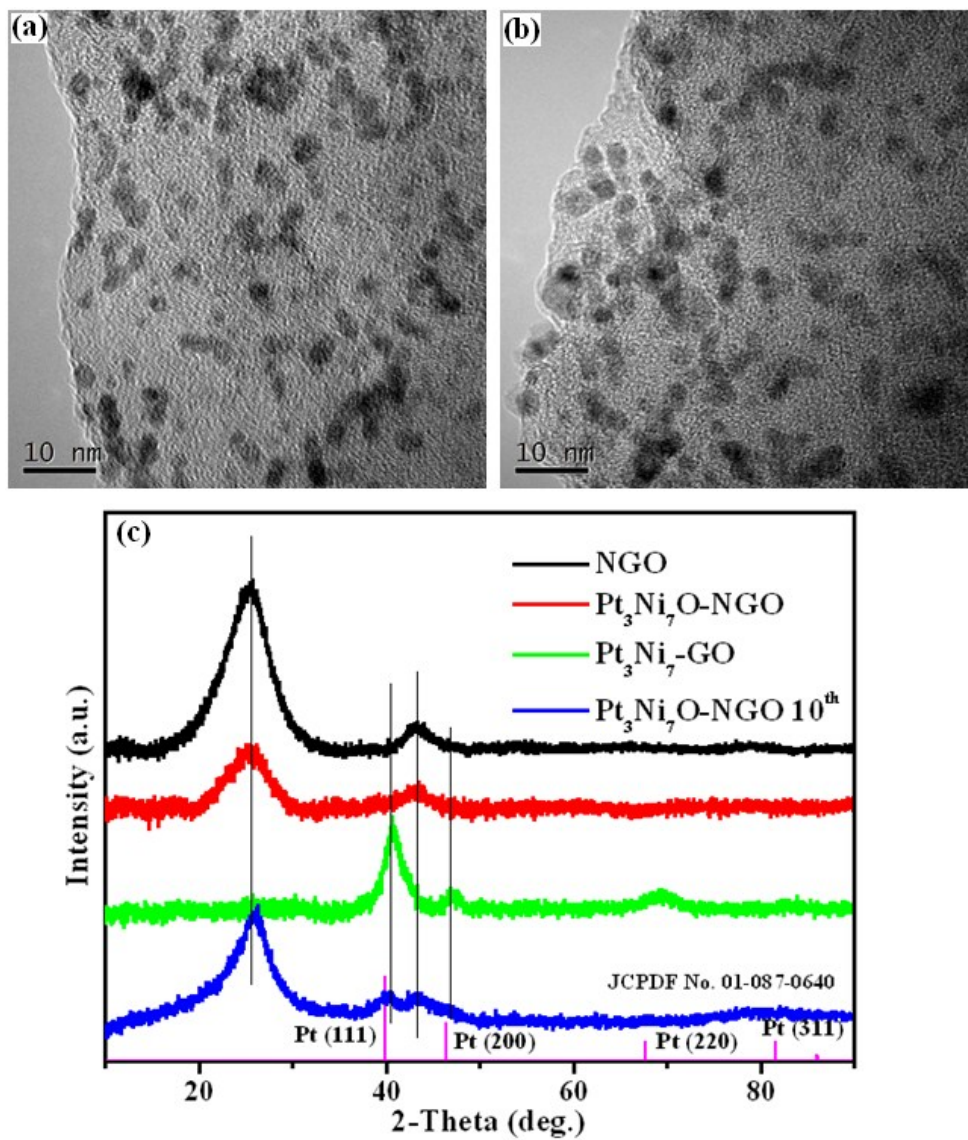

**Fig. S10.** (a) and (b): TEM images of the as-prepared Pt<sub>3</sub>Ni<sub>7</sub>O-NGO and Pt<sub>3</sub>Ni<sub>7</sub>O-NGO after 9 cycles (labeled as Pt<sub>3</sub>Ni<sub>7</sub>O-NGO 10<sup>th</sup>), respectively. (c) XRD patterns of NGO, Pt<sub>3</sub>Ni<sub>7</sub>O-NGO, Pt<sub>3</sub>Ni<sub>7</sub>-GO and Pt<sub>3</sub>Ni<sub>7</sub>O-NGO 10<sup>th</sup>.



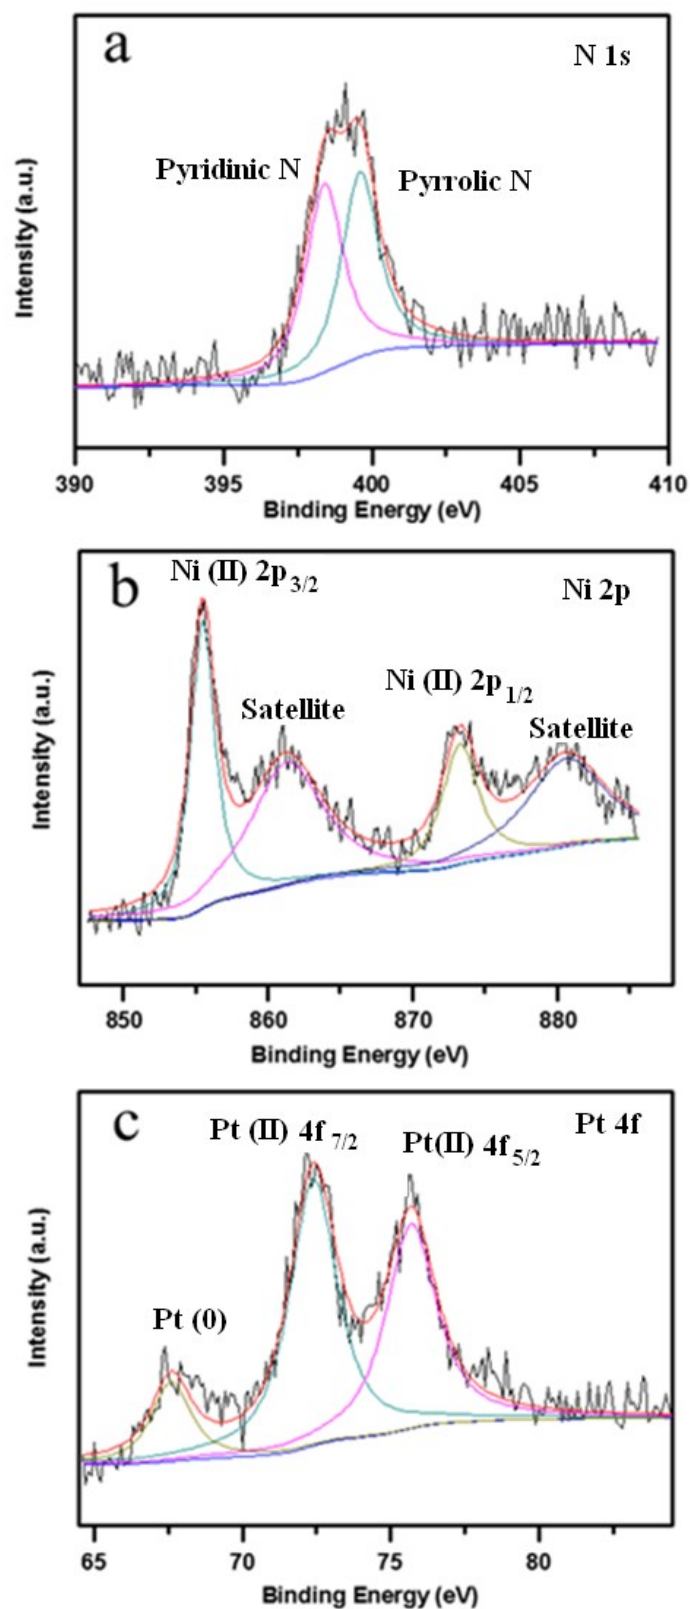

**Fig. S11.** XPS spectra of Pt<sub>3</sub>Ni<sub>7</sub>O-NGO at (a) N 1s, (b) Ni 2p, and (c) Pt 4f edges, respectively.

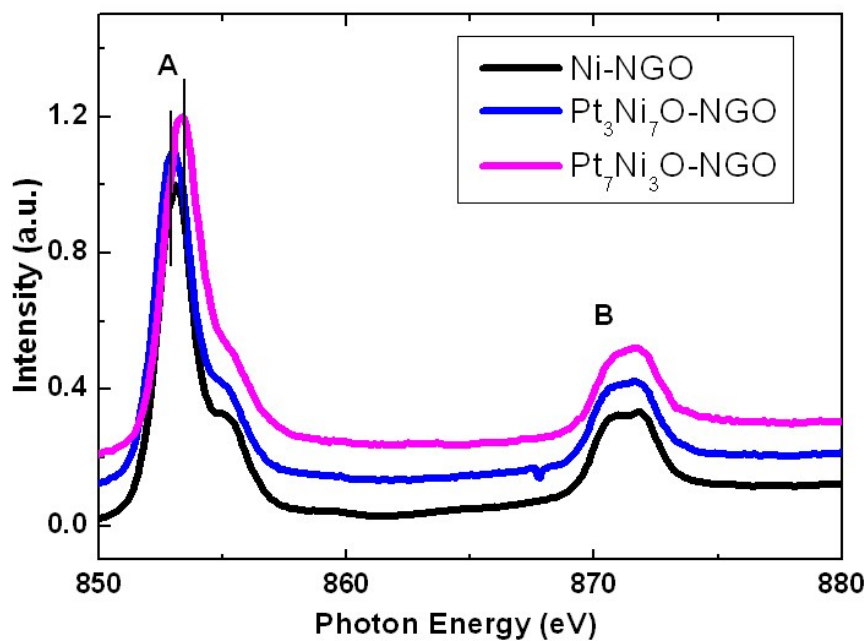

**Fig. S12.** Soft X-ray XAS spectra of Ni-NGO, Pt<sub>3</sub>Ni<sub>7</sub>O-NGO and Pt<sub>7</sub>Ni<sub>3</sub>O-NGO at Ni *L*-edge.

| Samples                               | Pt-loading (wt%) | Ni-loading (wt%) | The atomic ratio of Pt and Ni | TOF (H <sub>2</sub> ) mol/(Cat-M)mol·min | TOF (H <sub>2</sub> ) mol/(Cat-Pt)mol·min |
|---------------------------------------|------------------|------------------|-------------------------------|------------------------------------------|-------------------------------------------|
| Pt <sub>3</sub> Ni <sub>7</sub> O-NGO | 4.92             | 7.21             | 2:10                          | 120.7                                    | 709.6                                     |
| Pt <sub>5</sub> Ni <sub>5</sub> O-NGO | 9.14             | 4.49             | 6.1:10                        | 67.1                                     | 176.9                                     |
| Pt <sub>7</sub> Ni <sub>3</sub> O-NGO | 10.12            | 6.41             | 4.7:10                        | 42.5                                     | 132.0                                     |
| Pt <sub>3</sub> Ni <sub>7</sub> -GO   | 1.16             | 1.39             | 2.5:10                        | 68.2                                     | 339.2                                     |
| Ni-NGO                                | -                | 17.82            | -                             | 1.3                                      | -                                         |
| Pt-NGO                                | 13.50            | -                | -                             | 104.2                                    | 104.2                                     |
| NGO                                   | -                | -                | -                             | 0                                        | 0                                         |

**Table S1.** Pt and Ni contents (measured by ICP-OES) and the TOF values of various Pt<sub>x</sub>Ni<sub>10-x</sub>O-NGO, Pt<sub>3</sub>Ni<sub>7</sub>-GO, Ni-NGO, Pt-NGO and NGO samples.

| Catalyst                                     | TOF<br>(H <sub>2</sub> ) mol/(Cat-Pt)mol·min | T<br>(°C) | Ref.      |
|----------------------------------------------|----------------------------------------------|-----------|-----------|
| PtNi/NiO                                     | 1240.3                                       | 25        | 1         |
| Pt <sub>3</sub> Ni <sub>7</sub> O-NGO        | 709.6                                        | 25        | This work |
| Pt <sub>4</sub> Ni <sub>1</sub> @PVP NPs     | 638                                          | 25        | 2         |
| Pt/CNTs-O-HT                                 | 468                                          | 25        | 3         |
| Pt@MIL-101                                   | 414                                          | 25        | 4         |
| PEI-GO/Pt <sub>0.17</sub> Co <sub>0.83</sub> | 377.83                                       | 25        | 5         |
| Pt-TiO <sub>2</sub>                          | 311                                          | 25        | 6         |
| G4-OH(Pt <sub>12</sub> Ni <sub>48</sub> )    | 239.7                                        | 70        | 7         |
| Pt/γ-Al <sub>2</sub> O <sub>3</sub>          | 222.22                                       | 25        | 8         |
| Pt/C                                         | 111                                          | 25        | 9         |
| PtO <sub>2</sub>                             | 20.8                                         | 25        | 9         |
| Pt black                                     | 13.9                                         | 25        | 9         |

**Table S2.** Comparison of the TOF value of Pt-based catalysts for the hydrolysis of amine boranes in this work and those reported in the literatures.

References listed in Table S2:

1. Y. Ge, W. Ye, Z. H. Shah, X. Lin, R. Lu and S. Zhang, *ACS Appl. Mater. Interfaces*, 2017, **9**, 3749-3756.
2. S. Wang, D. Zhang, Y. Ma, H. Zhang, J. Gao, Y. Nie and X. Sun, *ACS Appl. Mater. Interfaces*, 2014, **6**, 12429-12435.
3. W. Chen, J. Ji, X. Duan, G. Qian, P. Li, X. Zhou, D. Chen and W. Yuan, *Chem. Commun.*, 2014, **50**, 2142-2144.
4. A. Aijaz, A. Karkamkar, Y. Choi, N. Tsumori, E. Rönnebro, T. Autrey, H. Shioyama and Q. Xu, *J. Am. Chem. Soc.*, 2012, **134**, 13926-13929.
5. M. Li, J. Hu, Z. Chen and H. Lu, *RSC Advances*, 2014, **4**, 41152-41158.
6. M. Khalily, H. Eren, S. Akbayrak, H. Akbayrak, N. Biyikli, S. özkar and M. Guler,

*Angew. Chem. Int. Ed.*, 2016, **55**, 12257-12261.

7. K. Aranishi, A. Singh and Q. Xu, *ChemCatChem*, 2013, **5**, 2248-2252.

8. M. Chandra and Q. Xu, *J. Power Sources*, 2007, **168**, 135-142.

9. Q. Xu and M. Chandra, *J. Alloy Compd.*, 2007, **446-447**, 729-732.

| Cycles           | TOF<br>(H <sub>2</sub> ) mol/(Cat-Pt)mol·min | Catalytic Efficiency |
|------------------|----------------------------------------------|----------------------|
| 1 <sup>st</sup>  | 709.6                                        | 100%                 |
| 2 <sup>nd</sup>  | 681.2                                        | 96.0%                |
| 3 <sup>rd</sup>  | 627.8                                        | 88.5%                |
| 4 <sup>th</sup>  | 627.8                                        | 88.5%                |
| 5 <sup>th</sup>  | 584.7                                        | 82.4%                |
| 6 <sup>th</sup>  | 584.7                                        | 82.4%                |
| 7 <sup>th</sup>  | 544.9                                        | 76.8%                |
| 8 <sup>th</sup>  | 544.9                                        | 76.8%                |
| 9 <sup>th</sup>  | 544.9                                        | 76.8%                |
| 10 <sup>th</sup> | 544.9                                        | 76.8%                |

**Table S3.** TOF values and the catalytic efficiencies of Pt<sub>3</sub>Ni<sub>7</sub>O-NGO in different cycles during the stability test.
